# Supplementary material
Source: Springer Nature journal article supplement (https://www.springermedizin.de/resource/supplementary/12906_2008_224_MOESM4_ESM.pdf/9524312)
Supplement: MOESM4 [file 9524312]

## **Disbelief of efficacy**

- a. 'I have no faith in it, I just do not think it would do any good'*
- b. I do not consider homeopathy generally to be a proper scientific approach - my wife had homeopathy for a problem - it did nothing to help*
- c. I consider this condition physical and not mental'. (referring to hypnotherapy)*
- d. 'Although I am not medically qualified, I don't feel a cream applied externally could affect an internal organ/system'.*

## **Past experiences of use**

- e. 'My doctor has prescribed two lots of medication which have not resolved my condition'*
- f. 'I have had acupuncture before and found it useless'*
- g. 'I have tried many, but don't like to rely on medications as if you come off it then nothing has changed'*

## **Satisfaction with current management**

- h. 'I already carry around a heat pad to alleviate symptoms'.*
- i. 'Present bowel symptoms are resolved by taking oral laxatives'*

## **Not appropriate for symptoms**

- j. 'It's not acute enough to really worry me at present'.*
- k. 'If I need help I would seek it but I do not want this to be a major part of my life'*
- l. 'Surely this would open the bowels more frequently, I need to stop it'*
